# Supplementary material for: Several orders of magnitude increase in the hydraulic permeability of flow-through capacitive deionization electrodes via laser perforations
Source: Royal Society of Chemistry journal article supplement (doi:10.1039/c7ra00459a), 2017-01-01
Supplement: c7ra00459a1.pdf [file c7ra00459a1.pdf]

Supplementary Information for

## Several orders of magnitude increase in hydraulic permeability of flow-through capacitive deionization electrodes via laser perforations

Eric N. Guyes<sup>a</sup>, Anastasia Simanovski<sup>a</sup>, Matthew E. Suss<sup>a,\*</sup>

<sup>a</sup>*Faculty of Mechanical Engineering, Technion – Israel Institute of Technology, Haifa 32000, Israel*

*\*Email: mesuss@tx.technion.ac.il*

### SI1: SEM images of the laser perforations

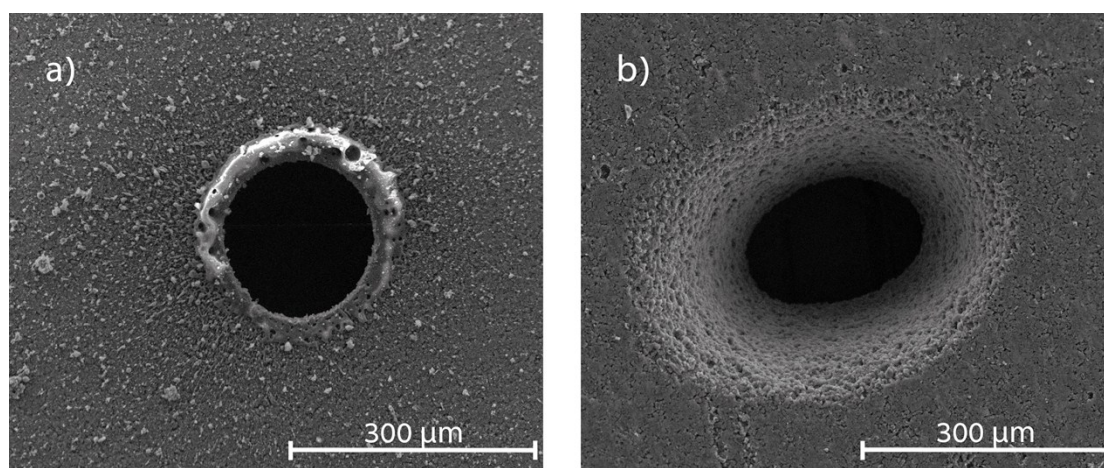

**Figure S1** – a) SEM image of a representative laser perforation, showing the aperture along the surface furthest from the laser head during the cutting operation. The aperture is circular with a roughly 200-μm diameter, and the white-tinged substance surrounding the perforation is assumed to be the PTFE binder, which was melted during laser cutting. b) A representative aperture along the surface closest to the laser head during the cutting operation. The aperture is elliptical and greater than 200 μm in characteristic size.

## SI2: CDI cell schematic and pressure modeling

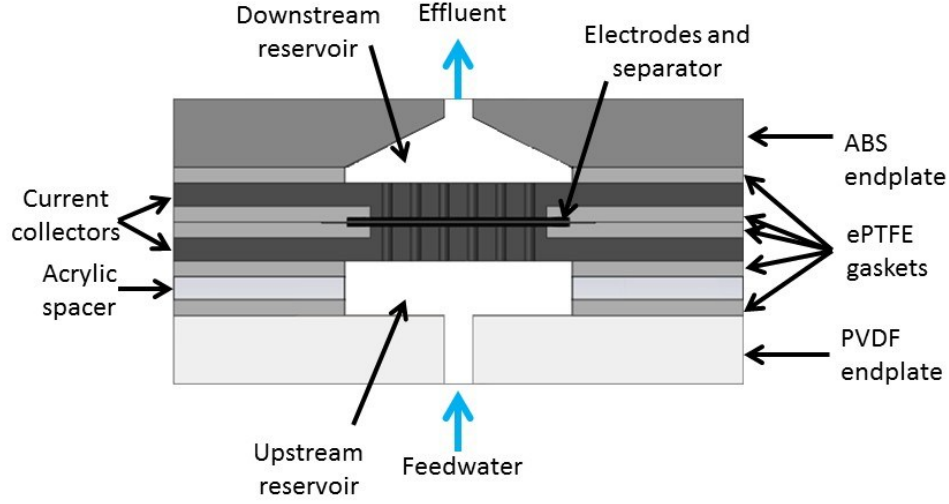

**Figure S2** – A schematic of the experimental CDI cell cross section. Dimensions and descriptions of each component are provided in the main text.

The pressure drop across the system is the sum of the pressure drops in each system component,  $\Delta P_i$ :

$$\Delta P = \sum_i \Delta P_i . \quad \backslash * \text{MERGEFORMAT (SI.1)}$$

The pressure drop expressions are listed in Table SI1 for each system component<sup>1,2</sup>.

**Table S1:** Models used for the pressure drop across each cell component in the cell with perforated electrodes.

| Component number ( <i>i</i> ) | Component name               | Model type                            | Expression                                                          |
|-------------------------------|------------------------------|---------------------------------------|---------------------------------------------------------------------|
| 1                             | Inlet tube                   | Poiseuille pipe flow                  | $\Delta P_1 = \frac{128\mu L_1 Q}{\pi D_1^4}$                       |
| 2                             | Upstream reservoir           | Sudden expansion into a reservoir     | $\Delta P_2 = \frac{\rho Q^2}{2A_{2,1}^2} (K_2 - 1 + \beta_2^{-4})$ |
| 3                             | Upstream current collector   | Poiseuille bundle of capillaries flow | $\Delta P_3 = \frac{32\mu L_3 Q}{A_f D_3^2 \psi_3}$                 |
| 4                             | Electrodes                   | Poiseuille bundle of capillaries flow | $\Delta P_4 = \frac{32\mu L_4 Q}{A_f D_4^2 \psi_4}$                 |
| 5                             | Downstream current collector | Poiseuille bundle of capillaries flow | $\Delta P_5 = \frac{32\mu L_5 Q}{A_f D_5^2 \psi_5}$                 |
| 6                             | Downstream reservoir         | Contracting conical diffuser          | $\Delta P_6 = \frac{\rho Q^2}{2A_{6,2}^2} (K_6 + 1 - \beta_6^4)$    |

|   |                   |                      |                                               |
|---|-------------------|----------------------|-----------------------------------------------|
| 7 | Outlet tubulation | Poiseuille pipe flow | $\Delta P_7 = \frac{128\mu L_7 Q}{\pi D_7^4}$ |
| 8 | Outlet tube       | Poiseuille pipe flow | $\Delta P_8 = \frac{128\mu L_8 Q}{\pi D_8^4}$ |

### Symbols

- $A_f$  – cross-sectional flow area (m<sup>2</sup>)
- $A_{i,1}$  – component upstream cross-sectional area (m<sup>2</sup>)
- $A_{i,2}$  – component downstream cross-sectional area (m<sup>2</sup>)
- $D_i$  – tube or perforation diameter (m)
- $f$  – laminar flow friction factor
- $K_i$  – loss coefficient
- $L_i$  – component length along flow direction (m)
- $Q$  – feedwater flow rate (m<sup>3</sup>/s)
- $\alpha$  – diffuser angle
- $\beta_i$  – effective outlet/inlet area ratio
- $\lambda$  – jet contraction ratio
- $\mu$  – feedwater viscosity (Pa s)
- $\rho$  – feedwater density (kg/m<sup>3</sup>)
- $\psi_i$  – component porosity

Determination of the two reservoir loss coefficients,  $K_i$ , is dependent on the reservoir geometry. The effective area ratio  $\beta_i$  is defined as

$$\beta_i = \sqrt{A_{i,2} / A_{i,1}} . \quad \backslash * \text{MERGEFORMAT (SI.2)}$$

The upstream reservoir loss coefficient  $K_2$  may then be calculated as

$$K_2 = (1 - \beta_2^2)^2 . \quad \backslash * \text{MERGEFORMAT (SI.3)}$$

The downstream reservoir is modeled as a conical reservoir. In this geometry, the jet contraction ratio  $\lambda$  is defined as

$$\lambda = 1 + 0.622 \sin(\alpha / 180)^{4/5} (1 - 0.215\beta^2 - 0.785\beta^5) . \quad \backslash * \text{MERGEFORMAT (SI.4)}$$

The diffuser angle  $\alpha$  is 146 degrees. The downstream reservoir loss coefficient  $K_6$  is then calculated as

$$K_6 = 0.0696 \sin(\alpha / 2) (1 - \beta_6^5) \lambda^2 + (\lambda - 1)^2 + \frac{f(1 - \beta_6^4)}{8 \sin(\alpha / 2)} \quad \backslash * \text{MERGEFORMAT (SI.5)}$$

The friction factor for laminar flow  $f$  is calculated at the outlet of the downstream reservoir and is given by

$$f = \frac{64}{\text{Re}} . \quad \backslash * \text{MERGEFORMAT (SI.6)}$$

It is important to note that  $f$  is a function of the Reynolds number  $Re$  and thus varies according to the flow rate  $Q$ .

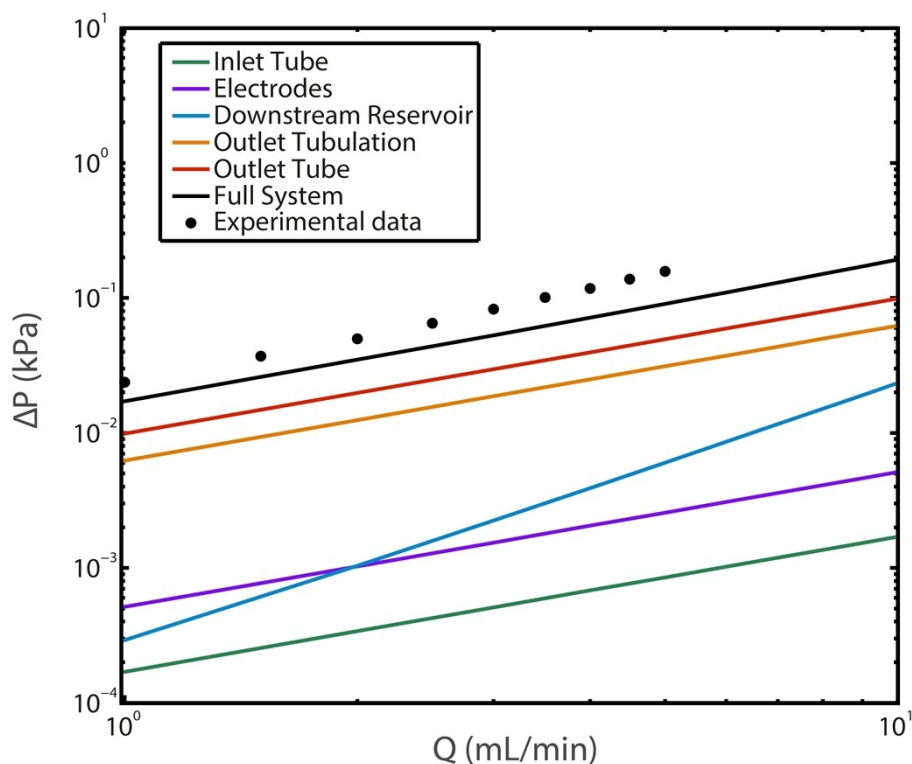

**Figure S3** – Plot of the expected pressure drop across each component in the system with perforated electrodes, calculated from the expressions in Table S1. The black line shows the predicted pressure drop across the full system, and the black dots show the experimentally measured feed pressure (both are also shown in Figure 2). The pressure drop across the outlet tubulation and downstream reservoir are predicted to be of the order or higher than that across the perforated electrodes.

### SI3: Current response of the CDI cell

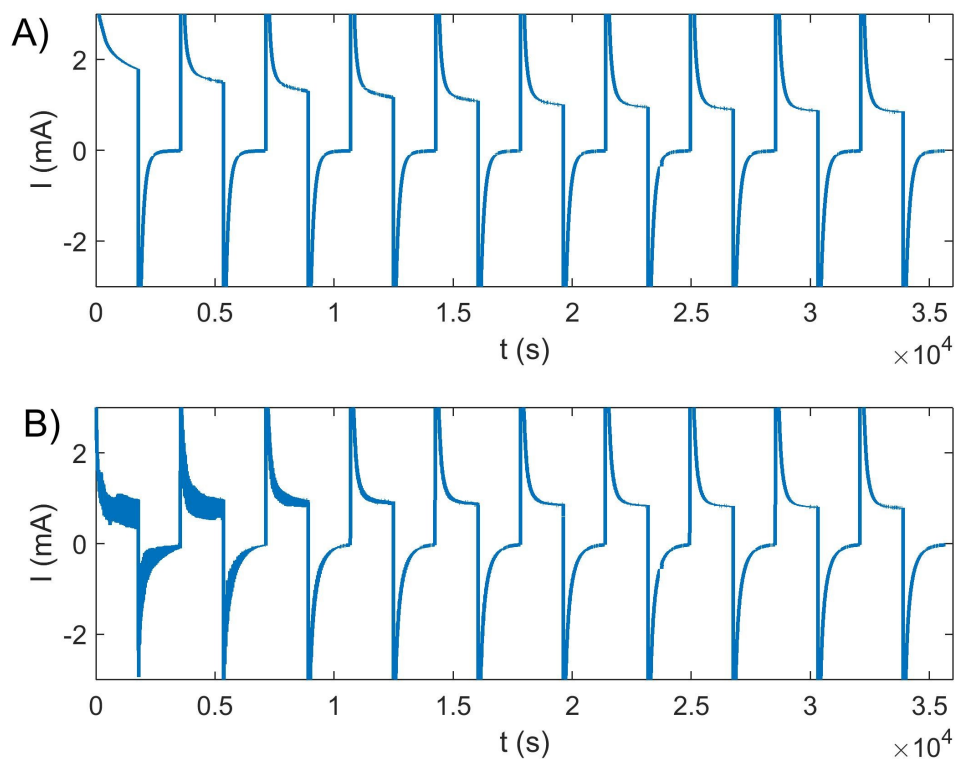

**Figure S4** – Measured current response of the CDI cell during cycling at 1.0 V charging/0 V discharging voltages. A) The unperforated electrodes system shows a 1<sup>st</sup> cycle leakage current of  $\sim 1.9$  mA, which stabilizes by the 5<sup>th</sup> cycle to  $\sim 1$  mA. B) The perforated electrodes system where cycles 4-10 show a leakage current of  $\sim 1$  mA.

#### SI4: Overlay of effluent concentration vs. time data

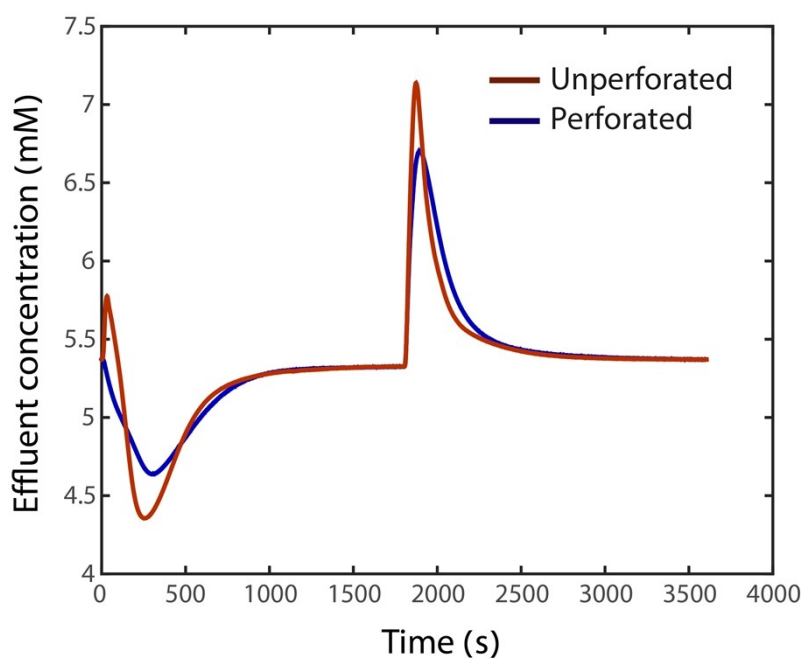

**Figure S5** – An overlay of the measured effluent concentration versus time for the 10<sup>th</sup> cycle shown in Figure 3A and 3B. Features of the cell with unperforated and perforated electrodes can be directly compared, showing sharper features and an inversion peak for the unperforated electrodes.

#### References

- 1 D. C. Rennels and H. M. Hudson, *Pipe Flow: A Practical and Comprehensive Guide*, John Wiley & Sons, 2012.
- 2 S. Yao and J. G. Santiago, *J. Colloid Interface Sci.*, 2003, **268**, 133–142.
